# Supplementary material for: 3d transition metal coordination on monolayer MoS2: a facile doping method to functionalize surfaces
Source: Royal Society of Chemistry journal article supplement (doi:10.1039/d2nr01132h), 2022-01-01
Supplement: d2nr01132h1.pdf [file d2nr01132h1.pdf]

## Support Information

### 3d Transition Metal Coordination on Monolayer MoS<sub>2</sub>: A facile doping method to functionalize surfaces

He Liu<sup>1,†</sup>, Walner Costa Silva<sup>2,†</sup>, Leonardo Santana Gonçalves de Souza<sup>2</sup>, Amanda Garcez Veiga<sup>2</sup>, Leandro Seixas<sup>3,4</sup>, Kazunori Fujisawa<sup>5,6,7</sup>, Ethan Kahn<sup>8</sup>, Tianyi Zhang<sup>8</sup>, Fu Zhang<sup>8</sup>, Zhuohang Yu<sup>8</sup>, Katherine Thompson<sup>1</sup>, Yu Lei<sup>8</sup>, Christiano J. S. de Matos<sup>3,4</sup>, Maria Luiza M. Rocco<sup>2</sup>, Mauricio Terrones<sup>1,6,7,8,\*</sup>, Daniel Grasseschi<sup>2,\*</sup>

#### Affiliations

<sup>1</sup>Department of Chemistry, The Pennsylvania State University, University Park, PA, 16802.

<sup>2</sup>Institute of Chemistry, Federal University of Rio de Janeiro (UFRJ), 21941-909, Rio de Janeiro, Brazil.

<sup>3</sup>MackGraphe-Graphene and Nanomaterials Research Center, Mackenzie Presbyterian Institute, 01302-907, São Paulo, Brazil.

<sup>4</sup>Engineering School, Mackenzie Presbyterian University, 01302-907, São Paulo, Brazil.

<sup>5</sup>Research Initiative for Supra-Materials (RISM), Shinshu University, 4-17-1 Wakasato, Nagano, 380-8553, Japan.

<sup>6</sup>Department of Physics, The Pennsylvania State University, University Park, PA, 16802.

<sup>7</sup>Center for 2-Dimensional and Layered Materials, The Pennsylvania State University, University Park, PA, 16802.

<sup>8</sup>Department of Materials Science and Engineering, The Pennsylvania State University, University Park, PA, 16802.

† - Equal contributors

\* - Corresponding authors

**Table S1:** Calculated adsorption energy ( $E_{\text{ads}}$ ), M-Mo distance and M-S bond length for first row transition metal coordination on surface

| Element | e Config      | $E_{\text{ads}}$ (eV) | M-Mo ( $\text{\AA}$ ) | M-S ( $\text{\AA}$ ) |
|---------|---------------|-----------------------|-----------------------|----------------------|
| Sc      | $3d^14s^2$    | -2.74                 | 3.32                  | 2.31                 |
| Ti      | $3d^24s^2$    | -3.02                 | 2.99                  | 2.32                 |
| V       | $3s^34s^2$    | -2.88                 | 2.84                  | 2.28                 |
| Cr      | $3d^54s^1$    | -1.58                 | 3.06                  | 2.38                 |
| Mn      | $3d^54s^2$    | -1.41                 | 2.96                  | 2.35                 |
| Fe      | $3d^64s^2$    | -2.64                 | 2.52                  | 2.13                 |
| Co      | $3d^74s^2$    | -3.05                 | 2.85                  | 2.06                 |
| Ni      | $3d^84s^2$    | -3.85                 | 2.58                  | 2.13                 |
| Cu      | $3d^{10}4s^1$ | -1.73                 | 2.83                  | 2.25                 |
| Zn      | $3d^{10}4s^2$ | -0.40                 | 4.13                  | 3.16                 |

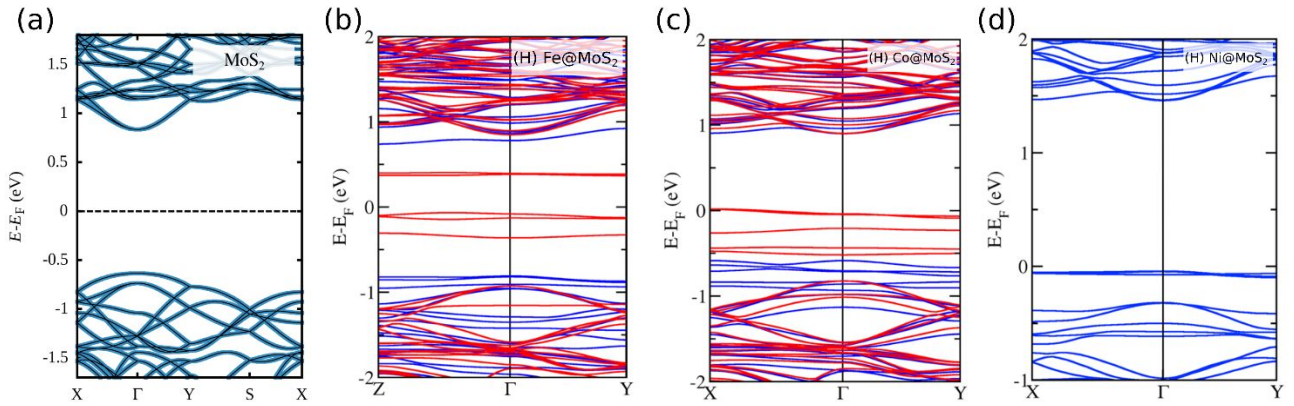

**Figure S1:** Electronic Band Dispersion of MoS<sub>2</sub> (a) and Fe (b), Co (c) and Ni (d) functionalization on H site. The blue and red curves indicate states with different spin polarization.

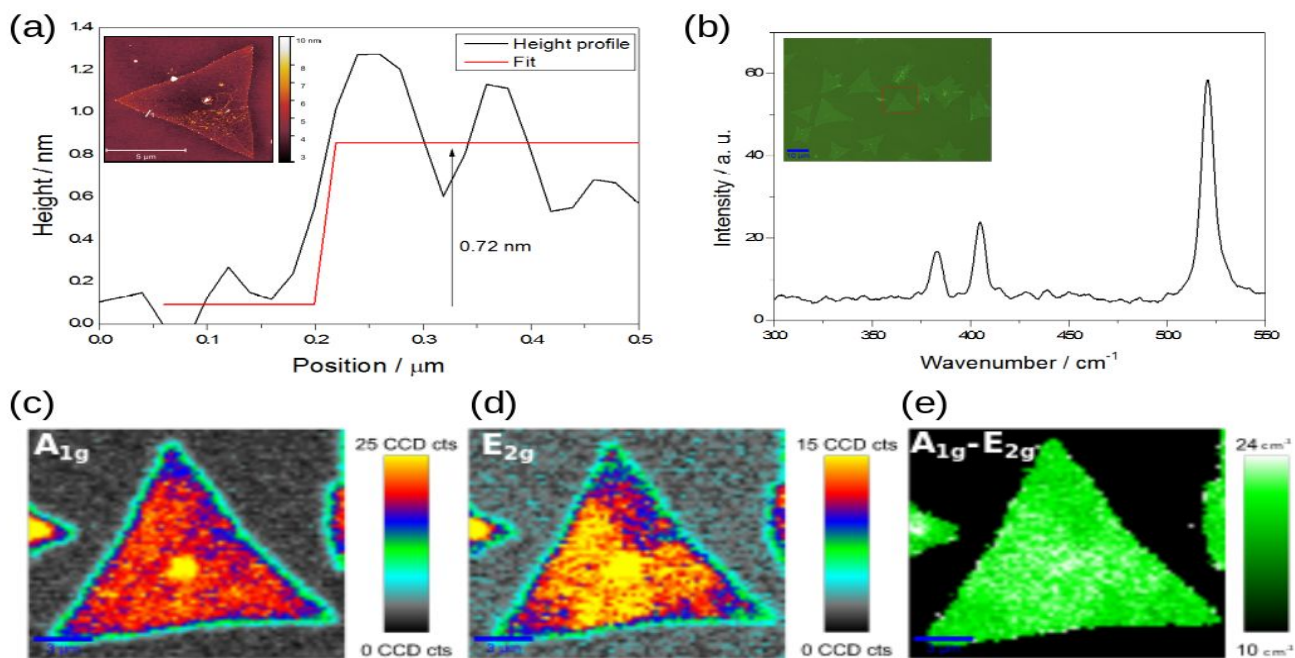

**Figure S2:** AFM image and height profile for MoS<sub>2</sub>-Ni samples (a). Optical microscopy of MoS<sub>2</sub>-Ni samples on inset (a,b). Raman spectra (b) and Raman mapping showing the A<sub>1g</sub> (c) and E<sub>2g</sub> (d) peaks intensity, and A<sub>1g</sub> and E<sub>2g</sub> wavenumber difference of MoS<sub>2</sub>-Ni samples (e).

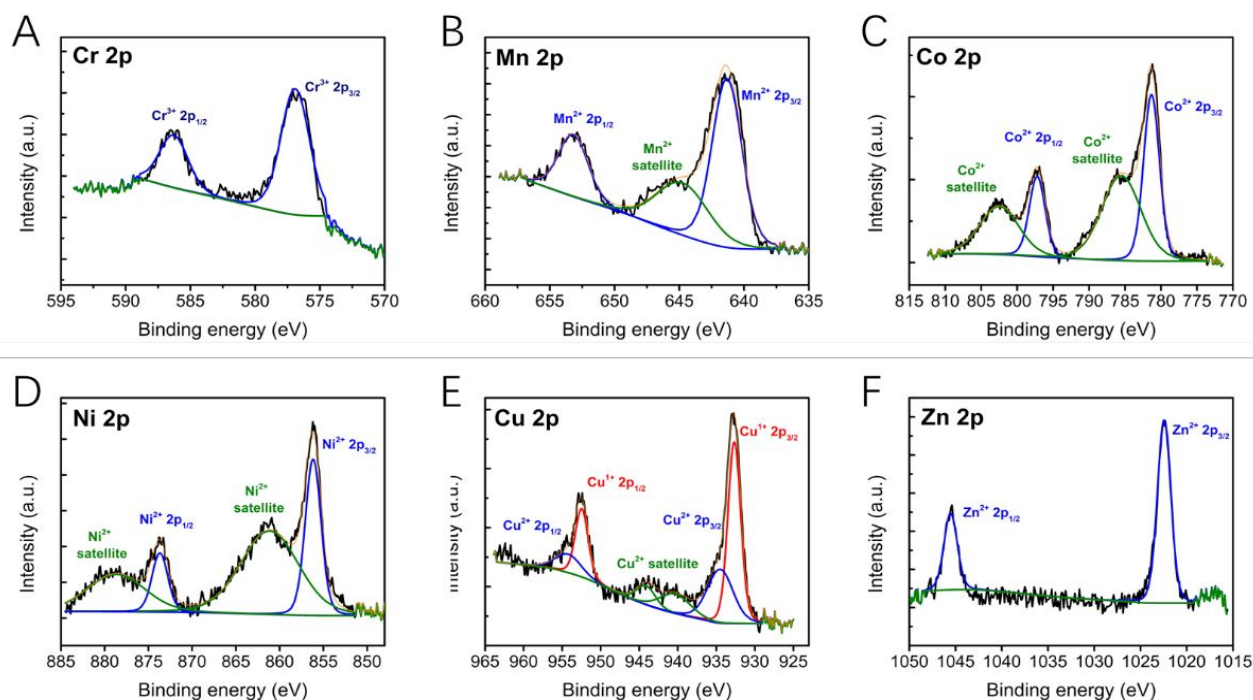

**Figure S3:** XPS spectra of TM 3d orbit after functionalization. (A) Cr 2p orbit of Cr-MoS<sub>2</sub>. The black curve is the original spectra after C1scalibaration. The blue curves are fitted to Cr<sup>3+</sup> 2p<sub>1/2</sub> and 2p<sub>3/2</sub> peaks and they match perfectly with the original spectra. (B) Mn 2p orbit of Mn-MoS<sub>2</sub>. The blue curves show the fitted Mn<sup>2+</sup> peaks. In addition to the fitted Mn 2p<sub>1/2</sub> and 2p<sub>3/2</sub> peaks, a Mn satellite peak is also visible in the green curve. (C) and (D) Co and Ni 2p orbit of Co-MoS<sub>2</sub> and Ni-MoS<sub>2</sub>. Similar satellite peaks could be fitted in addition to the Co<sup>2+</sup> and Ni<sup>2+</sup> peaks. (E) Cu 2p orbit of Cu-MOS<sub>2</sub>. Here the spectra are fitted into 3 groups. The Cu<sup>1+</sup> 2p peaks in red, the Cu<sup>2+</sup> 2p peaks in blue and the Cu<sup>2+</sup> satellite peaks in green. The presence of the Cu<sup>1+</sup> peaks indicate a reduction reaction between the Cu<sup>2+</sup> precursor and MoS<sub>2</sub>. Similar to that of Au and MoS<sub>2</sub>. (F) Zn 2p orbit of Zn-MoS<sub>2</sub> showing a perfect fit of Zn<sup>2+</sup> 2p<sub>1/2</sub>, 2p<sub>3/2</sub> and the original spectrum.

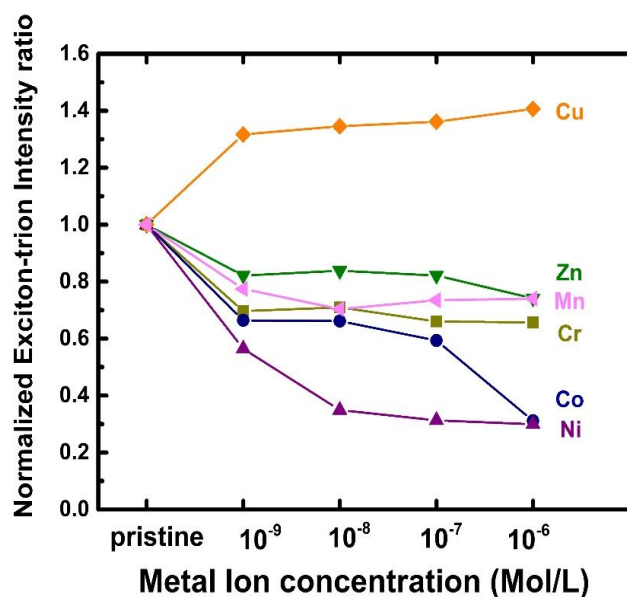

**Figure S4:** Normalized exciton to trion intensity changes showing the percent change in exciton to trion ratio for various TM functionalized MoS<sub>2</sub> samples at different TM concentrations. The TMs here can be separated into 3 groups. One is Cu, which is showing an increase to the exciton to trion ratio, indicating p-type doping on the MoS<sub>2</sub>. The second group is Zn, Mn and Cr where we see a small decrease in the ratio, indicating weak n-type doping of MoS<sub>2</sub>. The last group is Co and Ni where we see a large decrease in the ratio that corresponds to strong n-type doping of MoS<sub>2</sub>.

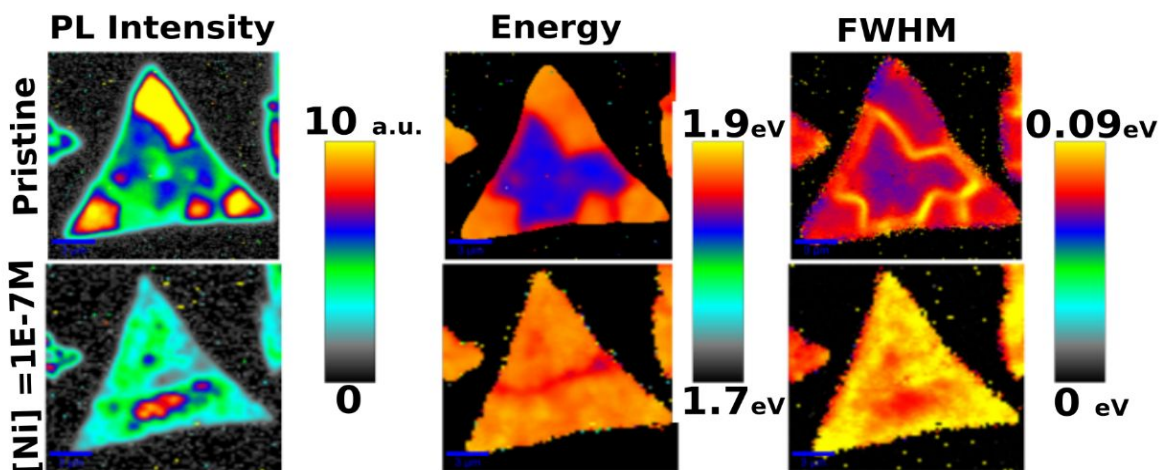

**Figure S5:** Photoluminescence mapping showing the PL intensity, energy of the maximum intensity, and the peak full width at half maximum (FWHM) of Pristine and Ni functionalized MoS<sub>2</sub>. Intensity changes are uniform through the whole flake, thus indicating homogenous dispersion onto the flake's surface.

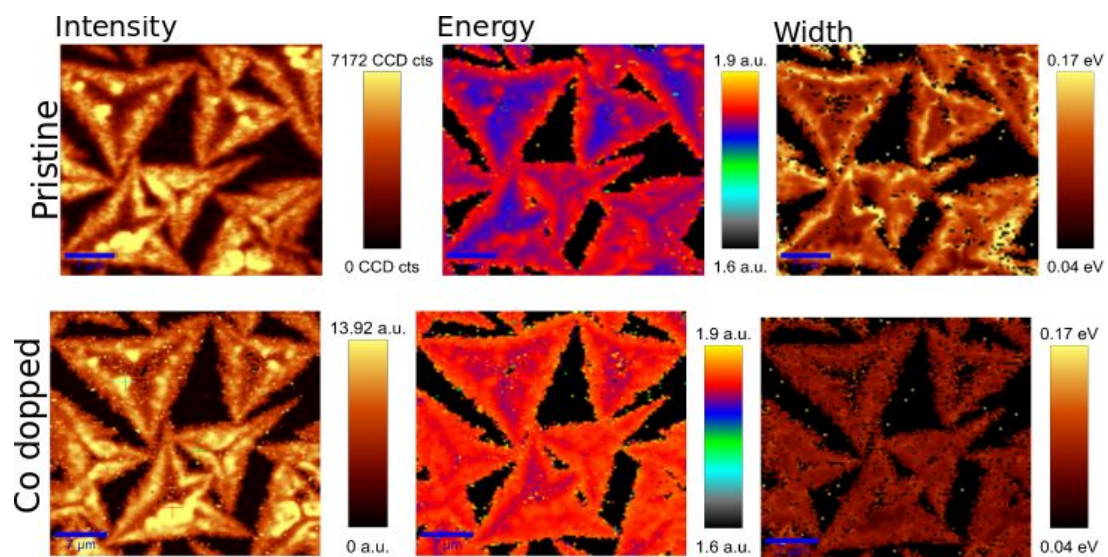

**Figure S6:** Photoluminescence mapping showing the PL intensity, energy of the maximum intensity, and the peak full width at half maximum (FWHM) of Pristine and Co functionalized MoS<sub>2</sub>. Intensity changes are uniform through the whole flake, thus indicating homogenous dispersion onto the flake's surface.

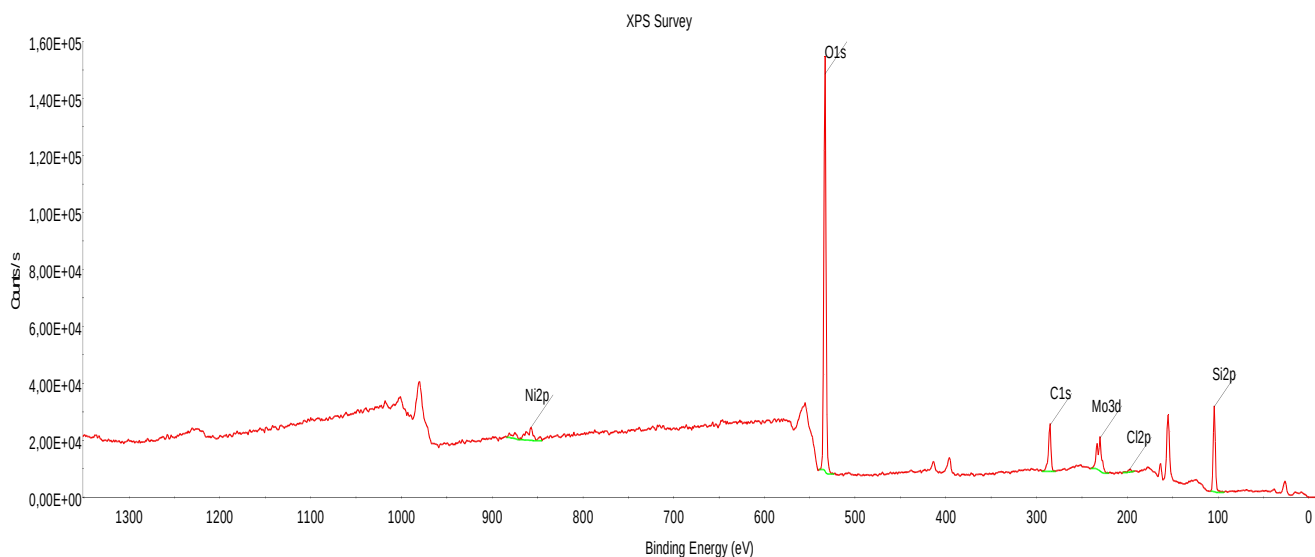

**Figure S 7:** Survey XPS spectra of  $\text{MoS}_2\text{-NiCl}_3$  samples showing the presence of  $\text{MoS}_2$  (Mo 3d and S 2p peaks), Ni (2p peak), and Cl (2p peak).

**Table S2:** Atomic percentage calculated from the  $\text{MoS}_2\text{-NiCl}_3$  XPS survey spectra.

| Name | Peak BE | FWHM eV | Area (P)<br>CPS.eV | Atomic % |
|------|---------|---------|--------------------|----------|
| O1s  | 533.11  | 2.81    | 407121.28          | 49.32    |
| Si2p | 104.03  | 2.82    | 83899.53           | 29.76    |
| C1s  | 285.22  | 2.9     | 54949.48           | 17.17    |
| Mo3d | 230.12  | 3.33    | 65903.51           | 2.12     |
| Ni2p | 857.04  | 3.56    | 55668.4            | 1.13     |
| Cl2p | 197.49  | 3.71    | 3831.59            | 0.5      |



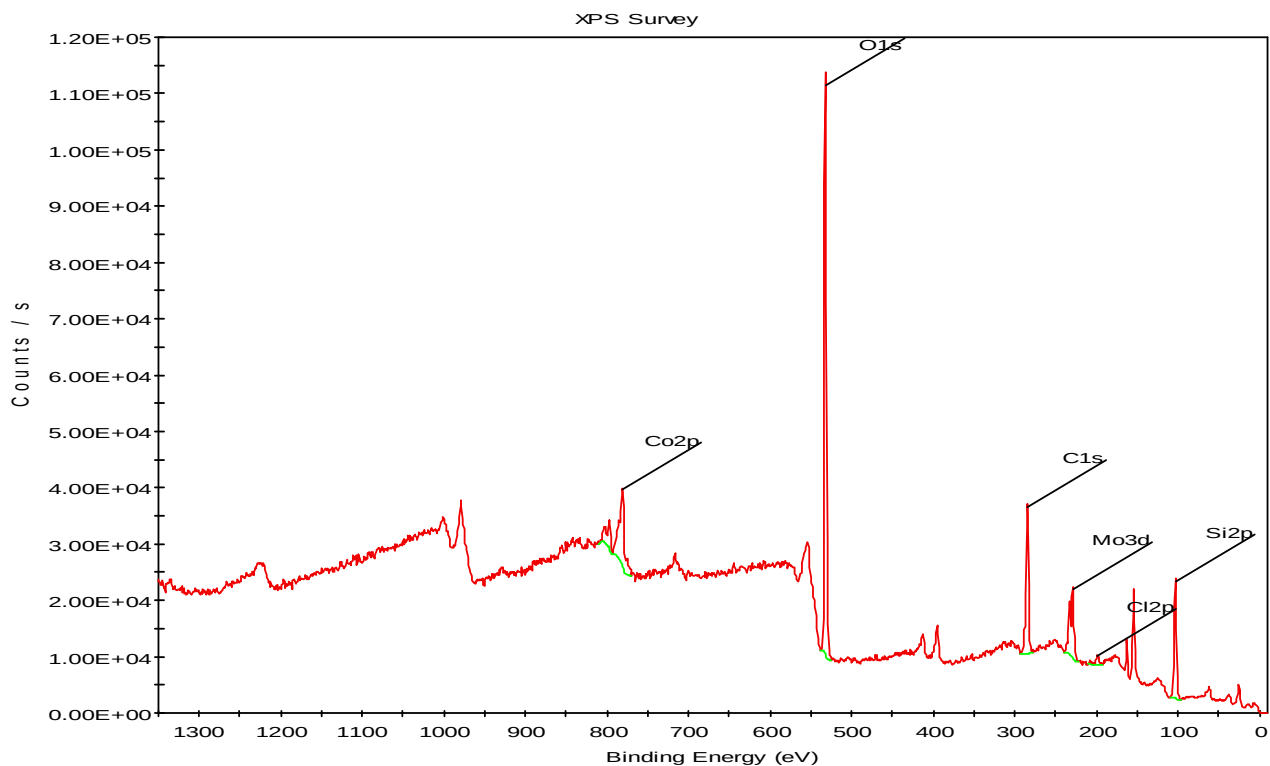

**Figure S8:** Survey XPS spectra of  $\text{MoS}_2\text{-CoCl}_3$  samples showing the presence of  $\text{MoS}_2$  (Mo 3d and S 2p peaks), Co (2p peak), and Cl (2p peak).

**Table S3:** Atomic percentage calculated from the  $\text{MoS}_2\text{-CoCl}_3$  XPS survey spectra.

| Name | Peak BE | FWHM eV | Area (P) CPS.eV | Atomic % |
|------|---------|---------|-----------------|----------|
| O1s  | 532.1   | 3.002   | 315827.46       | 39.95    |
| Si2p | 103.09  | 2.937   | 63121.09        | 23.38    |
| C1s  | 284.31  | 2.832   | 91342.13        | 29.79    |
| Co2p | 781.22  | 4.925   | 139550.87       | 3.21     |
| Mo3d | 229.21  | 3.207   | 72065.21        | 2.42     |
| Cl2p | 198.29  | 4.266   | 9115.36         | 1.25     |



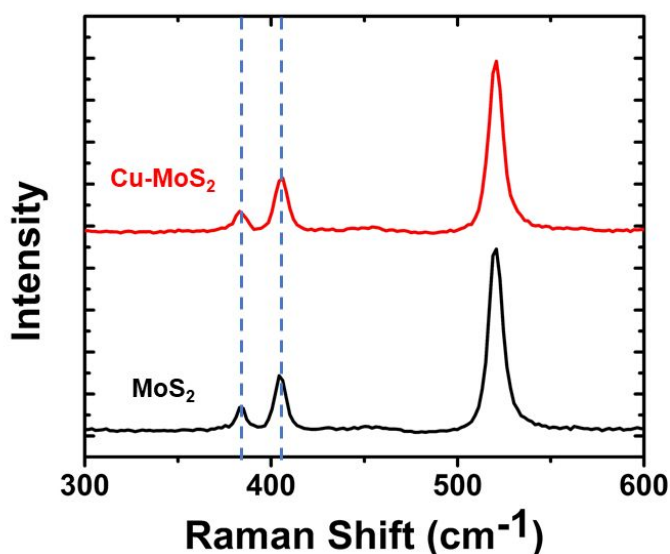

**Figure S9:** Raman Spectra of pristine and Cu functionalized MoS<sub>2</sub>. The MoS<sub>2</sub> signature peaks do not change in wavenumber or intensity after Cu functionalization, indicating the functionalization process do not alter the intrinsic structure of the MoS<sub>2</sub> lattice.

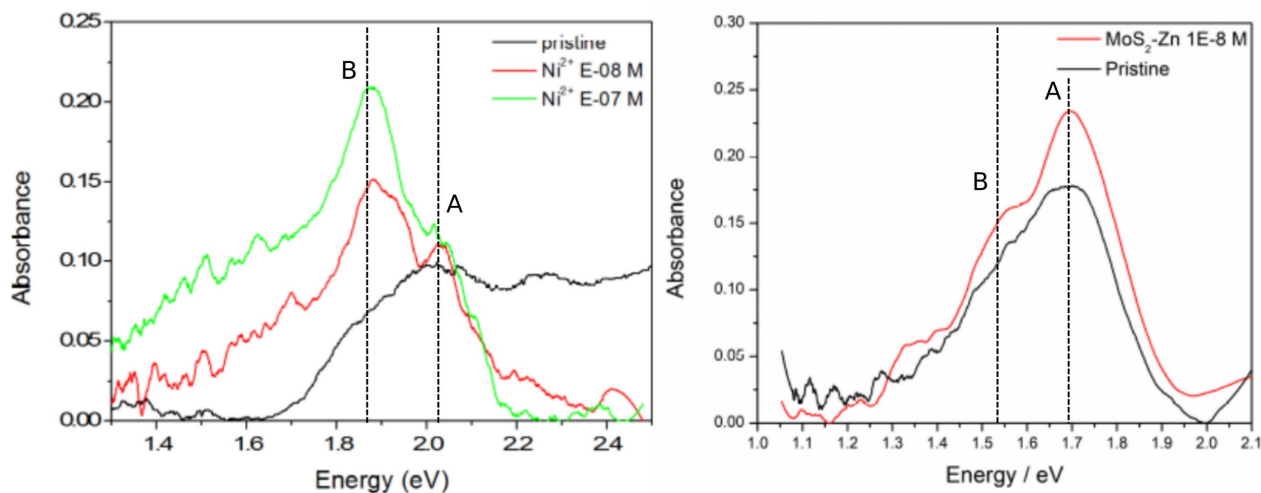

**Figure S10:** Room temperature absorbance spectra of the Ni-MoS<sub>2</sub> (right) and of Zn-MoS<sub>2</sub> (left) samples. A slight blue shift of the A and B excitons and new features associated with charge transfer transitions at energies lower than 1.6eV, are observed in the Ni-MoS<sub>2</sub> samples, as expected from the electronic band structure for the complex in Figure 2 of the main text.

Reflectance spectra were collected with a 400-2400 nm supercontinuum laser source (NKT Photonics), focused through a Nikon TU Plan Fluor EPI 50x objective (NA 0.8). Signal was collected with a

Yokogawa Optical Spectrum Analyzer (OSA), with sensitivity ranging from 350-1200 nm. The reflected light was measured as-grown on SiO<sub>2</sub>(300nm)/Si substrates, with an identical, clean substrate used for the calculation of reflectance through the relationship  $Reflectance = I_{sample}/I_{substrate}$ . Absorbance was calculated from reflectance using the relationship  $Absorbance = -\ln(10) * \ln(Reflectance)$ .

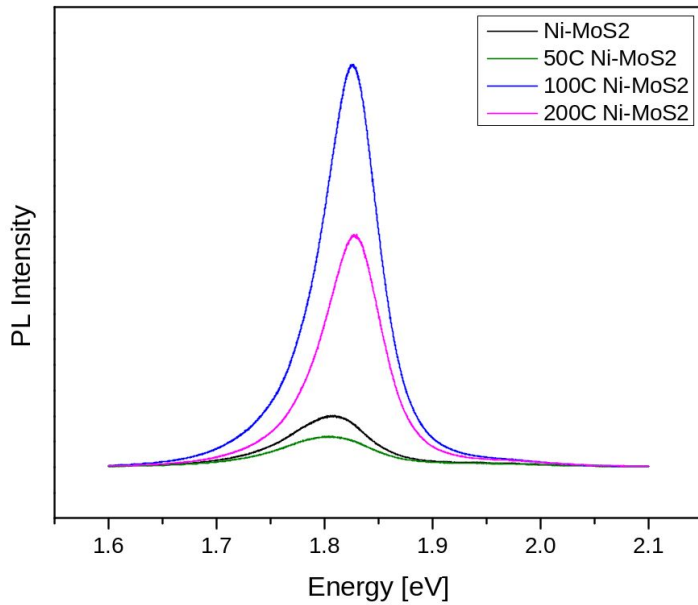

**Figure S11:** Photoluminescence spectrum of Ni functionalized MoS<sub>2</sub> monolayers at room temperature (black curve) and annealed at 50 °C (green curve), 100 °C (blue curve) and 200 °C (pink curve). Ni-MoS<sub>2</sub> samples at room temperature and annealed at 50 °C show excitation/trion ratio close to 0.4 and FWHM of 320 meV. Ni-MoS<sub>2</sub> annealed at 100 and 200 °C show excitation/trion ratio close to 1.6 and FWHM of 280 meV, similar to the pristine MoS<sub>2</sub>.

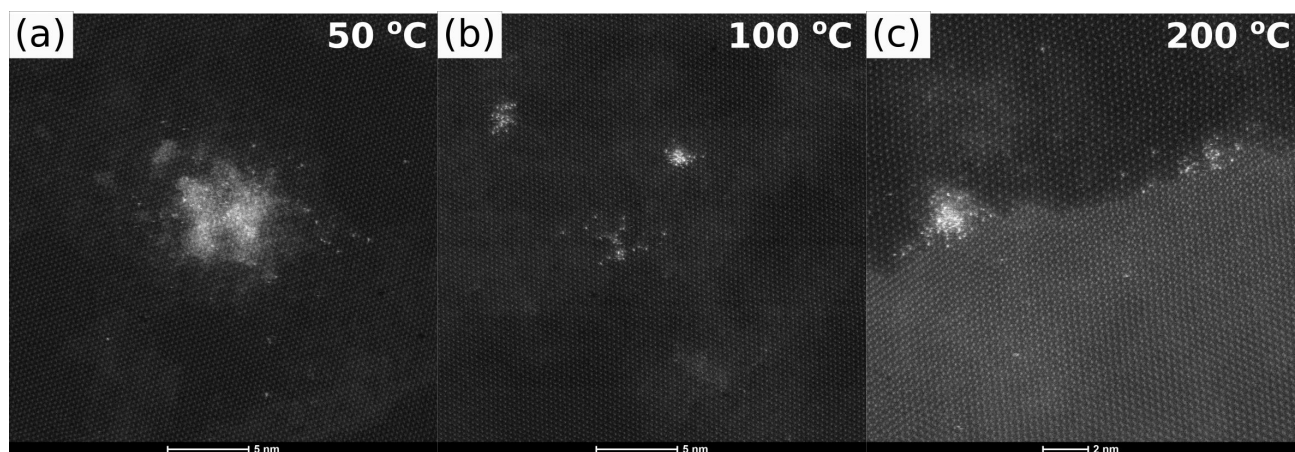

**Figure S12:** HAADF-STEM images of MoS<sub>2</sub>-Ni samples annealed at 50 °C (a), 100 °C (b) and 200 °C (c), where the bright spots show Ni single atoms atomically dispersed on the MoS<sub>2</sub> basal plane and some clustering can be seen.
